# Supplementary material for: A Decellularized Human Limbal Scaffold for Limbal Stem Cell Niche Reconstruction
Source: MDPI journal article supplement (doi:10.3390/ijms221810067), 2021-09-17
Supplement: s1 [file s1]

## A decellularized human limbal scaffold for limbal stem cell niche reconstruction

Naresh Poliseti<sup>1</sup>, Benjamin Roschinski<sup>1</sup>, Ursula Schlötzer-Schrehardt<sup>2</sup>, Philip Maier<sup>1</sup>,  
Günther Schlunck<sup>1</sup>, Thomas Reinhard<sup>1</sup>

Supplementary Figure S1: Uncropped version of Western Blot shown in Figure 1

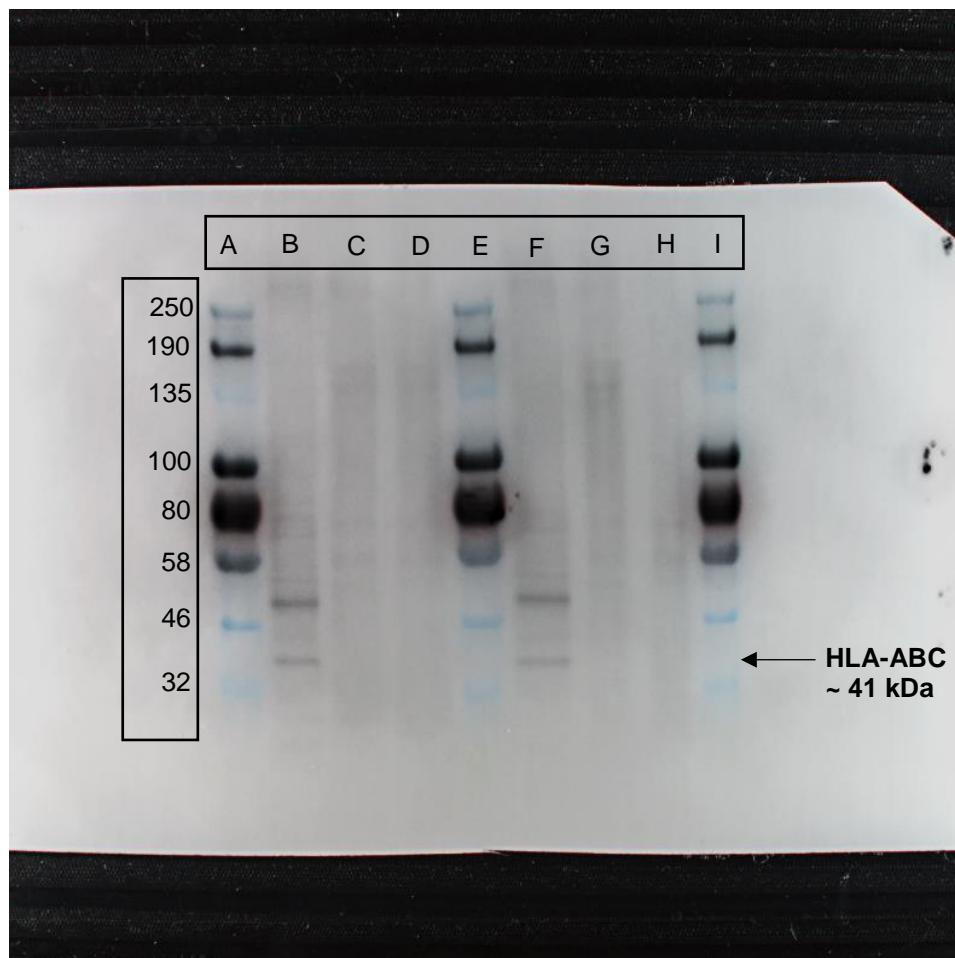

**A, E, I** – Ladder

**B, F** – Normal human limbus (NHL)

**C, G** – Decellularized human limbus (DHL) in 0% dextran

**D, H** – DHL in 4% dextran

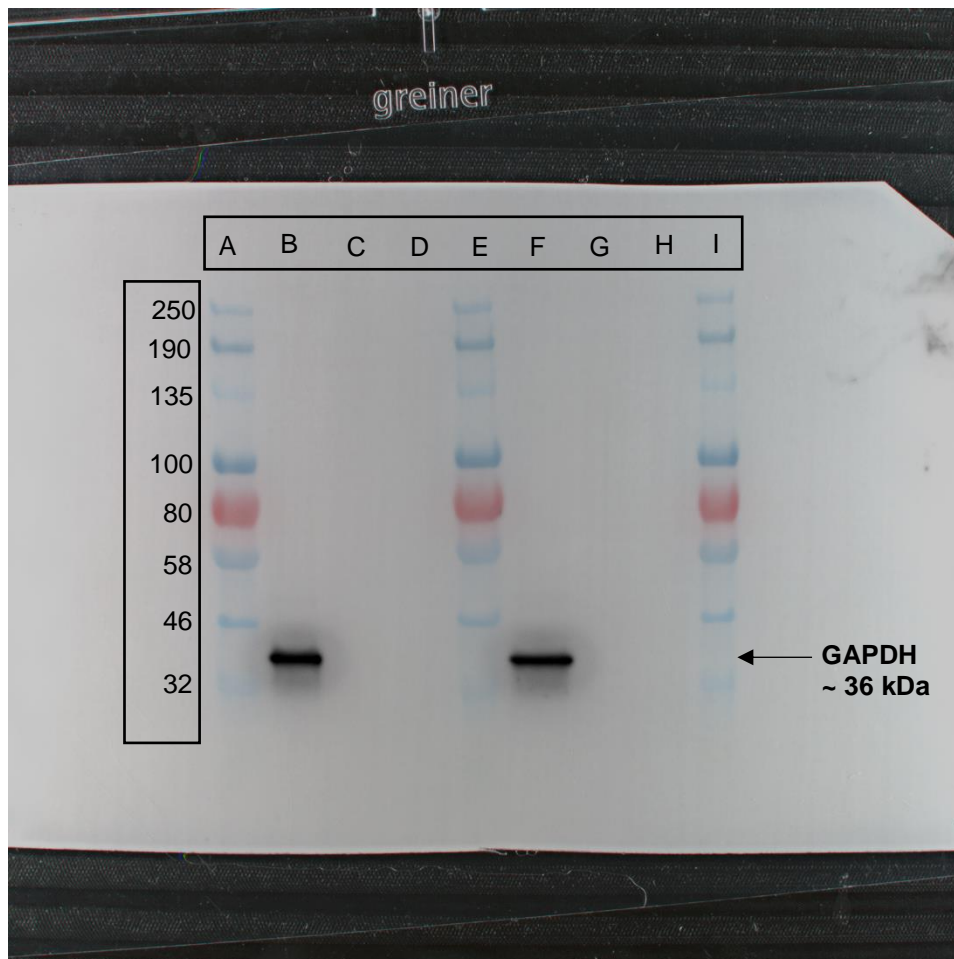

**A, E, I** – Ladder

**B, F** – Normal human limbus (NHL)

**C, G** – Decellularized human limbus (DHL) in 0% dextran

**D, H** – DHL in 4% dextran

**Supplementary Figure S2:** Ex vivo transplantation of DHL tissue. Abbreviations: NHL- normal human limbus; DHL – decellularized human limbus

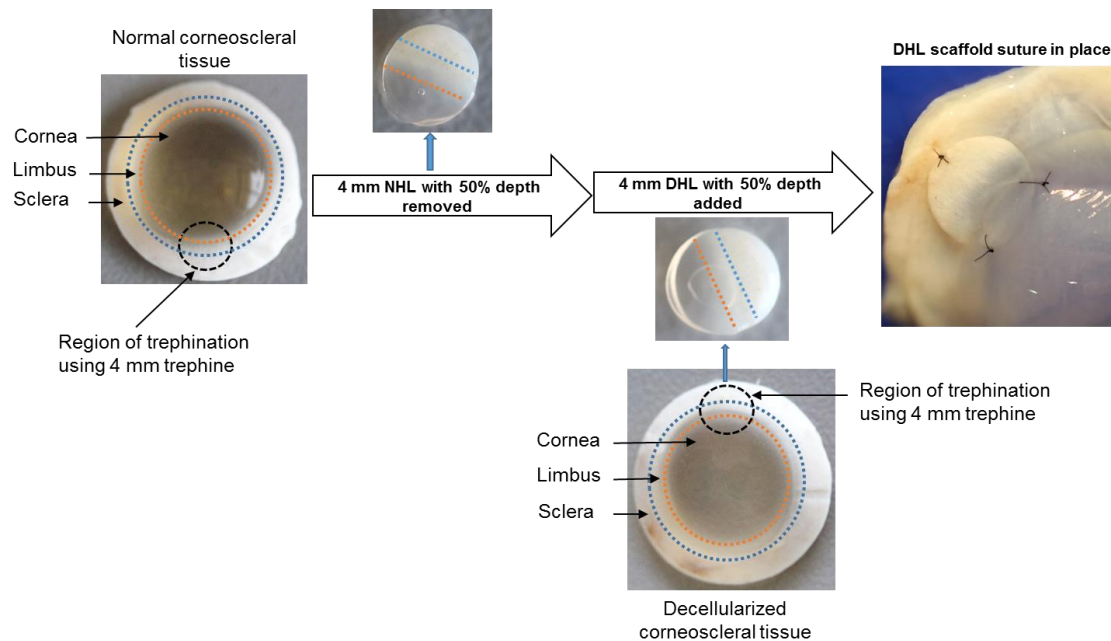

**Supplementary Figure S3:** Preparation of normal human limbus (NHL) and decellularized human limbal (DHL) scaffolds.

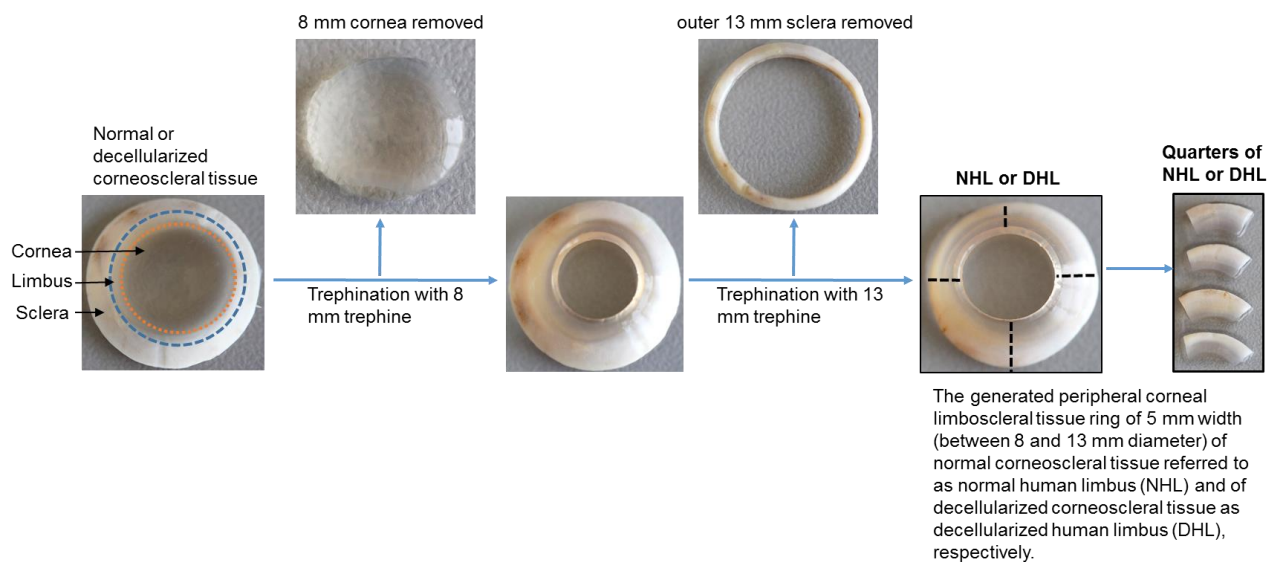

**Supplementary Table S1.** List of antibodies used

| <b>Antibody (clone), Host species</b> | <b>Antibody dilution</b> | <b>Application</b>                | <b>Antibody source</b> |
|---------------------------------------|--------------------------|-----------------------------------|------------------------|
| Aggrin, rabbit                        | 1:2000                   | Immunohistochemistry              | R. Timpl / T. Sasaki   |
| Cadherin-E (24E10), rabbit            | 1:200                    | Immunohistochemistry              | Cell signaling         |
| Collagen III, rabbit                  | 1:100                    | Immunohistochemistry              | Abcam                  |
| Collagen IV (2F11), mouse             | 1:100                    | Immunohistochemistry              | Southern Biotech       |
| Collagen XVIII, rabbit                | 1:2000                   | Immunohistochemistry              | R. Timpl / T. Sasaki   |
| Cytokeratin pan (PCK-26), mouse       | 1:500                    | Immunohistochemistry              | Abcam                  |
| Cytokeratin 3 (AE5), mouse            | 1:100                    | Immunohistochemistry              | Abcam                  |
| Cytokeratin 15 (LHK15), mouse         | 1:500                    | Immunohistochemistry              | Abcam                  |
| Cytokeratin 15 (EPR1614Y), rabbit     | 1:500                    | Immunohistochemistry              | Abcam                  |
| HMB-45 (HMB45), mouse                 | 0.5 µg/ml                | Immunocytochemistry               | Abcam                  |
| HLA-ABC (W6/32)                       | 1:100                    | Immunohistochemistry/Western blot | Invitrogen             |
| Fibronectin (IST-4), mouse            | 1:100                    | Immunohistochemistry              | Sigma-Aldrich          |
| JAM-C (CRAM-19H36), rat               | 1:100                    | Immunohistochemistry              | Serotec (Biorad)       |
| Ki-67 (EPR3610), rabbit               | 1:500                    | Immunohistochemistry              | Abcam                  |
| Laminin α3, rabbit                    | 1:1000                   | Immunohistochemistry              | R. Timpl / T. Sasaki   |
| Laminin α5 (504), rabbit              | 1:1000                   | Immunohistochemistry              | L. Sorokin, Münster    |
| Laminin β2 (409), rabbit              | 1:1000                   | Immunohistochemistry              | L. Sorokin, Münster    |
| Laminin β3, rabbit                    | 1:1000                   | Immunohistochemistry              | R. Timpl / T. Sasaki   |
| Laminin γ2, rabbit                    | 1:1000                   | Immunohistochemistry              | R. Timpl / T. Sasaki   |
| Melan A, (EPR20380), rabbit           | 1:1000                   | Immunohisto/cytochemistry         | Abcam                  |
| p63 (Y289), rabbit                    | 1:200                    | Immunohistochemistry              | Abcam                  |
| Tenascin C, rabbit                    | 1:200                    | Immunohistochemistry              | Millipore              |
| Vimentin, (D21H3), rabbit             | 1:500                    | Immunohistochemistry              | Cell Signaling         |
| Vitronectin (8E6), mouse              | 1:100                    | Immunohistochemistry              | Millipore              |
